# Supplementary material for: Fisetin reduces the senescent tubular epithelial cell burden and also inhibits proliferative fibroblasts in murine lupus nephritis
Source: PubMed Central journal article supplement (PMC9714549; doi:10.3389/fimmu.2022.960601), 2022-11-17
Supplement: DataSheet_1.pdf [file DataSheet_1.pdf]

Supplementary File for

**Fisetin reduces the senescent tubular epithelial cell burden and also inhibits proliferative fibroblasts in murine lupus nephritis**

**Shogo Ijima<sup>1</sup>, Yuki Saito<sup>2\*</sup>, Kentaro Nagaoka<sup>2</sup>, Sena Yamamoto<sup>3</sup>, Tsukasa Sato<sup>3</sup>, Norihiro Miura<sup>3</sup>, Taiki Iwamoto<sup>2</sup>, Maki Miyajima<sup>3</sup>, and Takako S. Chikenji<sup>2,3\*</sup>**

<sup>1</sup>Department of Oral Surgery, Sapporo Medical University School of Medicine, Sapporo, Japan

<sup>2</sup>Department of Anatomy, Sapporo Medical University School of Medicine, Sapporo, Japan

<sup>3</sup>Department of Health Sciences, School of Medicine, Hokkaido University, Sapporo, Japan

**\* Correspondence:**

**Takako S. Chikenji, PhD**

Address: North12 West5, Kitaku, Sapporo, 060-0812, Japan

Telephone: 011-706-3382 FAX: 011-706-3382

Email: [chikenji@pop.med.hokudai.ac.jp](mailto:chikenji@pop.med.hokudai.ac.jp)

**Yuki Saito, Ph.D.**

Address: South1 West17, chuoku, Sapporo, 060-8556, Japan

Telephone: 011-611- 2111

Email: [yuki.saito@sapmed.ac.jp](mailto:yuki.saito@sapmed.ac.jp)

**ORCID:**

0000-0002-7949-1628 (Yuki Saito)

0000-0003-2832-3656 (Takako S. Chikenji)

## Supplementary Figures

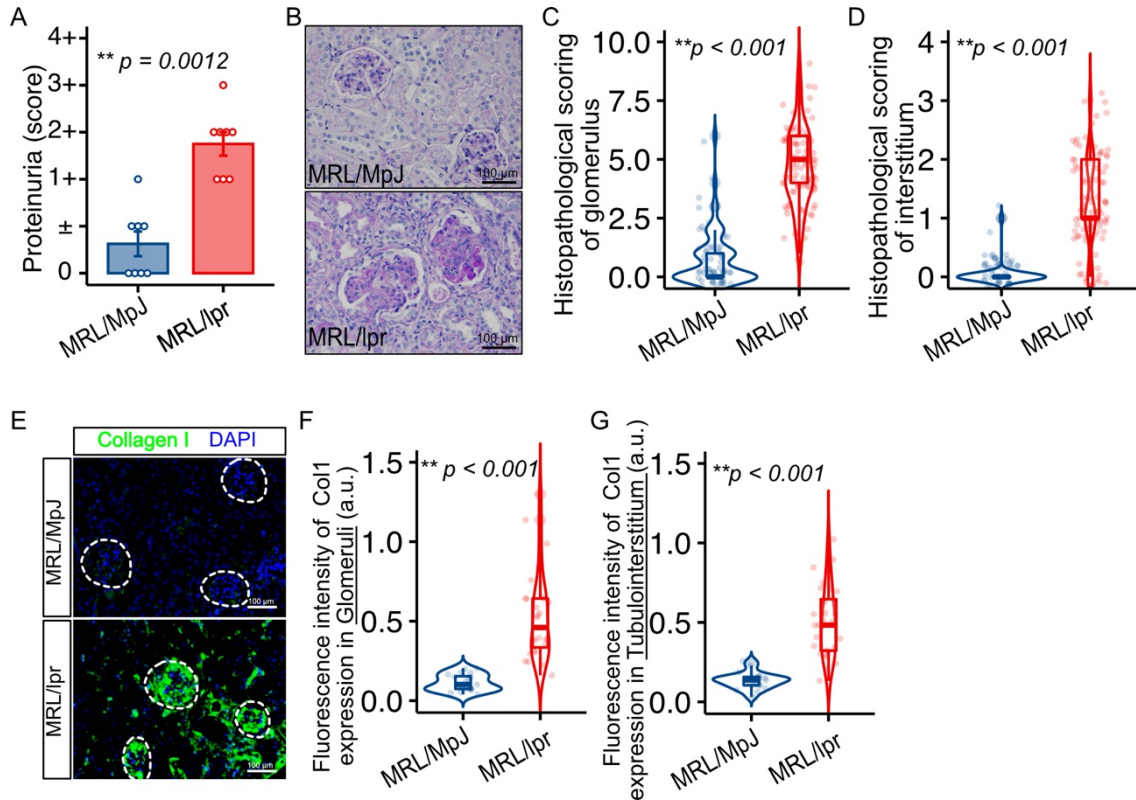

**Supplemental Figure 1. Histopathology and collagen I expression in the kidneys of MRL/lpr mice.** (A) Semi-quantitative data of proteinuria in MRL/lpr and MRL/MpJ mice. Data are presented as means $\pm$ SEM.  $p$ -values were determined by the two-tailed Student's  $t$ -test. (B) Representative images of periodic acid-Schiff staining in kidney sections from MRL/lpr and MRL/MpJ mice. Scale bars represent 100  $\mu\text{m}$ . (C–D) Quantification of histopathological scoring of glomeruli and tubulointerstitium. Data are presented as violin plots, dot plots, and box-and-whisker plots. The  $p$ -values were determined using the two-tailed Student's  $t$ -test.  $**P < 0.01$ ,  $***P < 0.001$  for MRL/lpr vs control (MRL/MpJ). (E) Representative images of immunohistochemical staining for type I collagen (green) and nuclei (blue) in kidney sections from MRL/lpr and MRL/MpJ mice. Scale bars represent 100  $\mu\text{m}$ . (F–G) Quantification of type I collagen expression in glomeruli and tubulointerstitium by fluorescence intensity (arbitrary units, a.u.). Data are presented as violin plots, dot plots, and box-and-whisker plots.  $P$ -values were determined using the two-tailed Student's  $t$ -test.  $**P < 0.01$ ,  $***P < 0.001$  for MRL/lpr vs. MRL/MpJ (control).

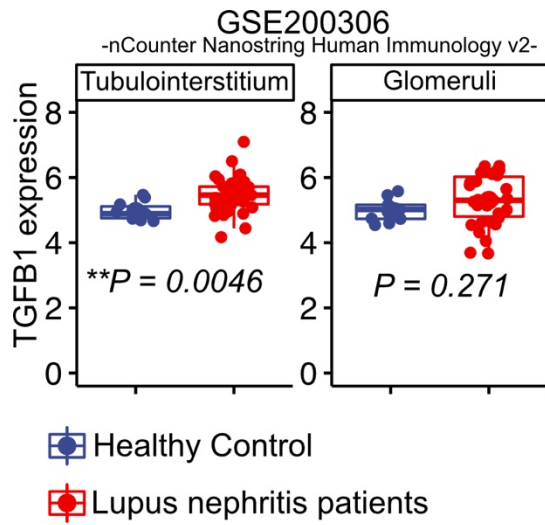

**Supplemental Figure 2. TGFB1 gene expression was increased in the tubulointerstitium but not in glomeruli in lupus nephritis patients.** Data are presented as medians with IQRs and 1.5 times the IQR, and are displayed as dot plots and box-and-whisker plots.  $P$ -values were determined using the two-tailed Student's  $t$ -test.

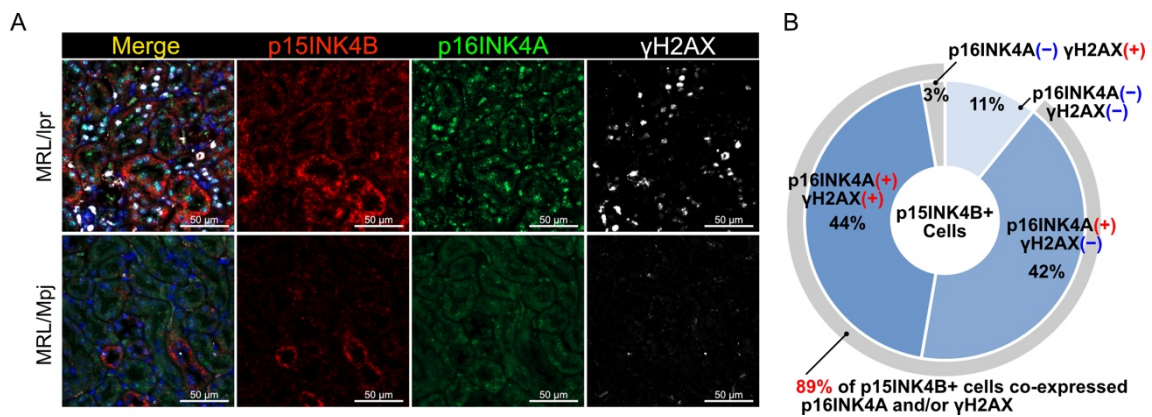

**Supplemental Figure 3. p15<sup>INK4B</sup>, p16<sup>INK4A</sup>, and  $\gamma$ H2AX expression in the kidneys of MRL/lpr and MRL/MpJ mice.** (A) Representative images showing kidney tissue following immunostaining for p15<sup>INK4B</sup>, p16<sup>INK4A</sup>, and  $\gamma$ H2AX. Tissue samples were collected from the kidneys of MRL/lpr and MRL/MpJ mice. (B) Pie chart showing proportions of cells positive for any or all of p15<sup>INK4B</sup>, p16<sup>INK4A</sup>, and  $\gamma$ H2AX.

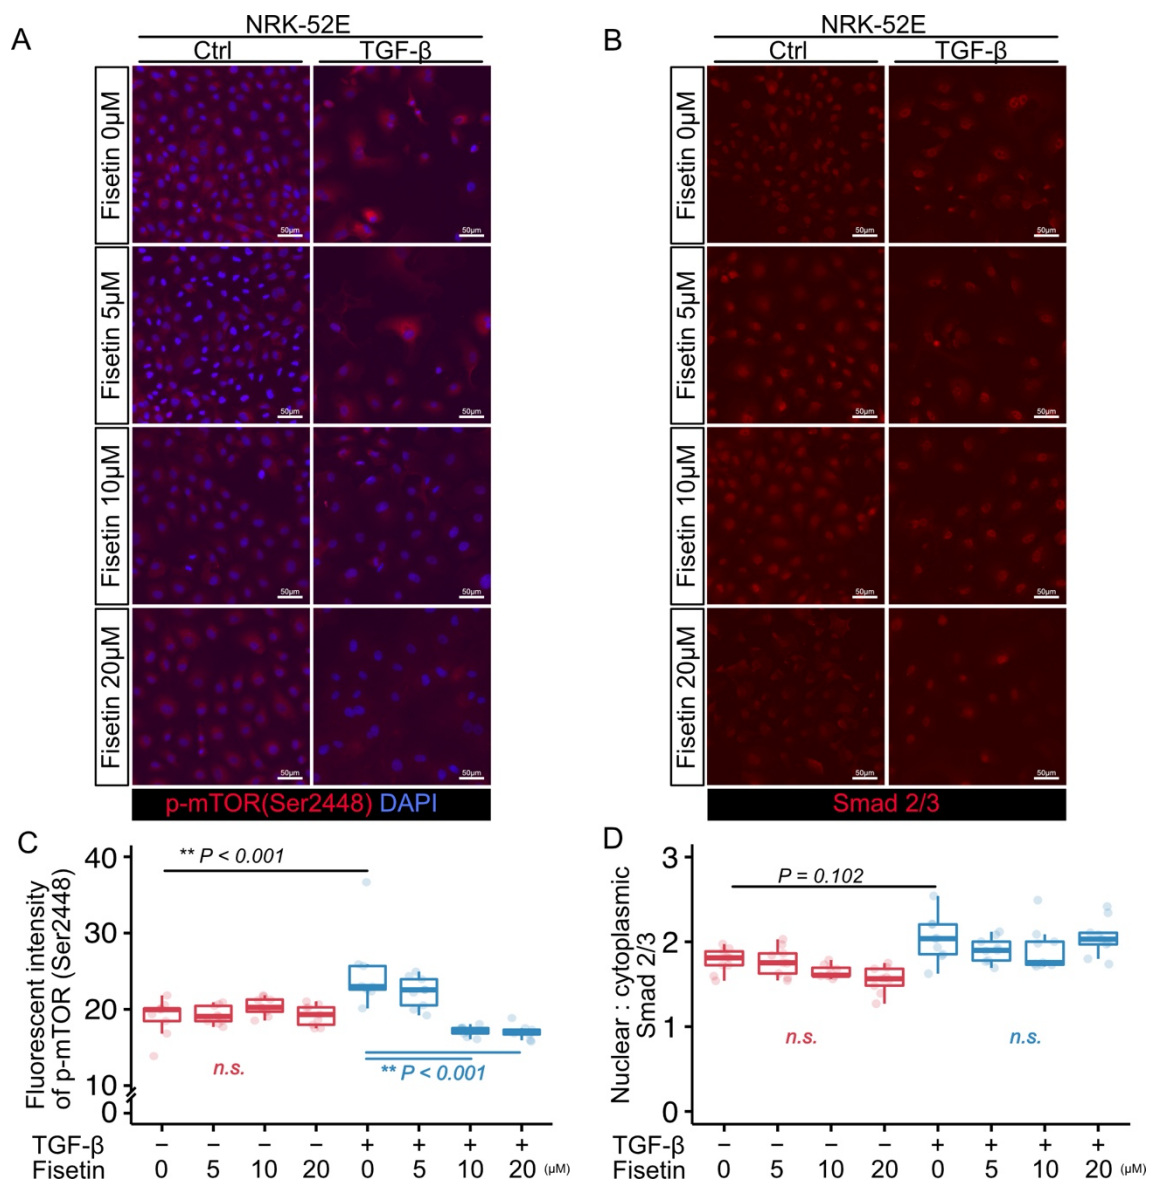

**Supplemental Figure 4. Fisetin decreased phospho-mTOR in a Smad2/3-independent manner in TGF- $\beta$ 1-treated senescent renal tubular cells.** (A and B) Representative images of phospho-mTOR and Smad2/3 staining in TGF- $\beta$ 1-treated senescent NRK-52E cells with or without fisetin treatment (0, 5, 10, 20  $\mu$ M). (C and D) Fluorescence intensities were used to quantify phospho-mTOR and Smad2/3 expression levels in NRK-52E cells. *P*-values were determined using two-way ANOVA adjusted by Tukey's method (\*\**P*<0.01).

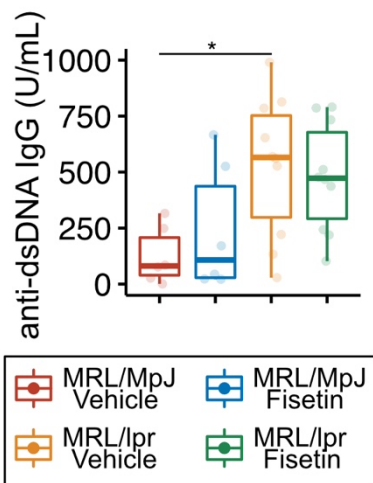

**Supplemental Figure 5. Fisetin improved serum dsDNA autoantibody concentrations in MRL/lpr mice.** Data are presented as medians with IQRs and 1.5 times the IQR, and are displayed as dot plots and box-and-whisker plots. *P*-values were determined using one-way ANOVA adjusted by Tukey's method ( $*P < 0.05$ ).

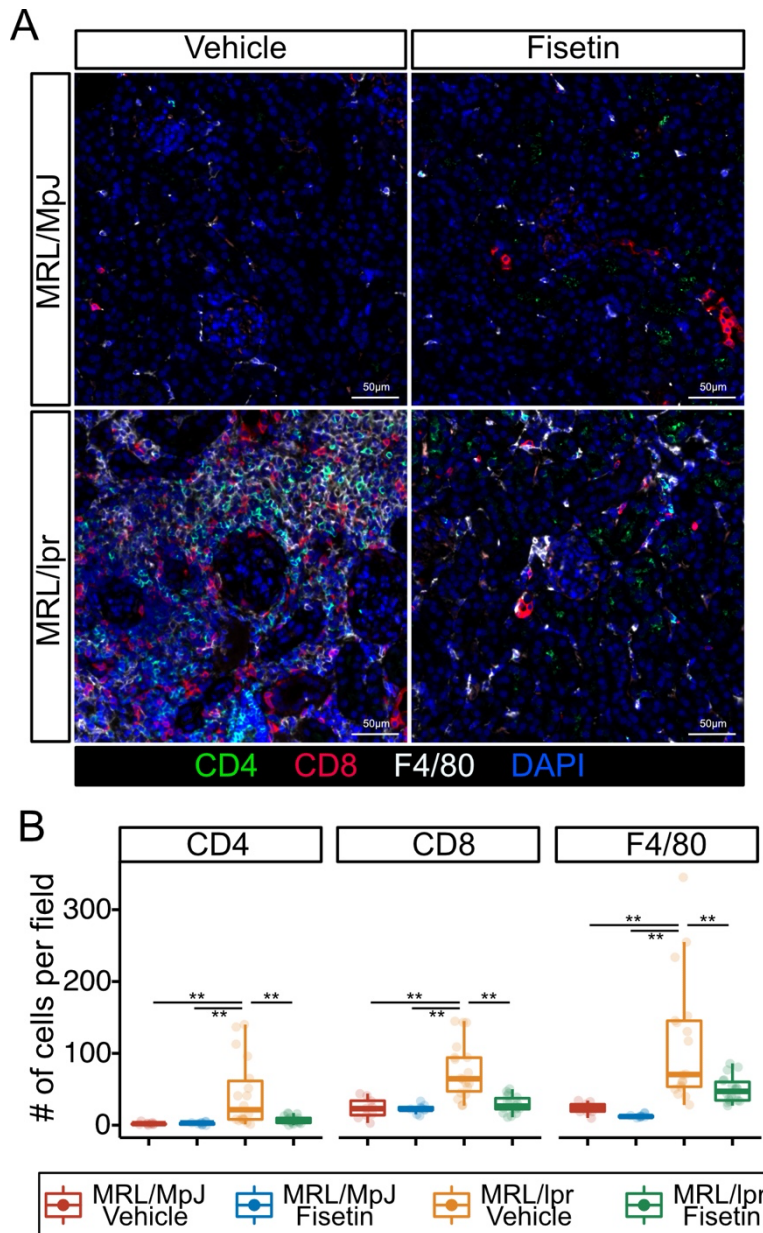

**Supplemental Figure 6. Fisetin decreased the numbers of CD4-, CD8-, and F4/80-positive cells in the kidneys of MRL/lpr mice.** (A) Representative images of kidney tissue following immunostaining for CD4, CD8, and F4/80. (B) Quantification of the numbers of CD4-, CD8-, and F4/80-positive cells in the tubulointerstitium. Data are presented as dot plots and box-and-whisker plots. *P*-values were determined using one-way ANOVA adjusted by Tukey's method (\*\**P*<0.01).

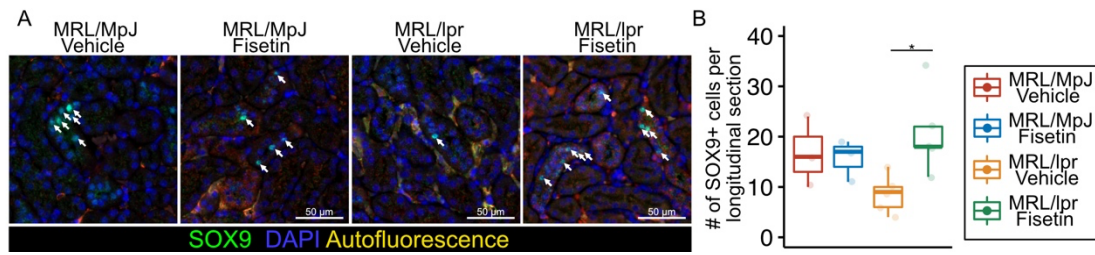

**Supplemental Figure 7. Fisetin increased the number of Sox9-positive cells in MRL/lpr mice.** (A) Representative images of kidney tissue following immunostaining for Sox9 (green), DAPI (blue), Autofluorescence (yellow). (B) Quantification of the number of Sox9-positive cells in tubules. Data are presented as dot plots and box-and-whisker plots. *P*-values were determined using one-way ANOVA adjusted by Tukey's method (\**P*<0.05).

Supplementary Table 1. specific primer sequence

**Mouse specific primer sequence used for real-time PCR**

| <i>Gene</i>        | <i>Forward</i>                 | <i>Reverse</i>                 |
|--------------------|--------------------------------|--------------------------------|
| <i>Acta2</i>       | 5' ACGCTGAAGTATCCGA 3'         | 5' CATTCTCTCCCGGTTGG 3'        |
| <i>Cdkn2a(P19)</i> | 5' GGGTCGCAGGTTCTTGGTC 3'      | 5' AATCTGCACCGTAGTTGAGCA 3'    |
| <i>Cdkn1a(p21)</i> | 5' TCCCGACTCTTGACATTGCT 3'     | 5' TGCAGAAGGGGAAGTATGGG 3'     |
| <i>Cdkn2a(P16)</i> | 5' GGGTTTCGCCAACGCCCGA 3'      | 5' TGCAGCACCACCAGCGTGTCC 3'    |
| <i>Cdkn2b</i>      | 5' AATAACTTCCTACGCATTTTCTGC 3' | 5' CCCTTGGCTTCAAGGTGAG 3'      |
| <i>Col1a1</i>      | 5' CCTCAGGGTATTGCTGGACAAC 3'   | 5' CAGAAGGACCTTGTGGCCAGG 3'    |
| <i>Col3a1</i>      | 5' GACCAAAAGGTGATGCTGGACAG 3'  | 5' CAAGACCTCGTGCTCCAGTTAG 3'   |
| <i>Fn1</i>         | 5' ATCTGGACCCCTCTGATAGT 3'     | 5' GCCCAGTGATTTTCAGCAAAGG 3'   |
| <i>Il1b</i>        | 5' TGCCACCTTTTGACAGTGATG 3'    | 5' TGATGTGCTGCTGCGAGATT 3'     |
| <i>Il1b</i>        | 5' TGGACCTTCCAGGATGAGGACA 3'   | 5' GTTCATCTCGGAGCCTGTAGTG 3'   |
| <i>Il6</i>         | 5' TGATTGTATGAACAACGATGATGC 3' | 5' GGACTCTGGCTTTGTCTTTCTTGT 3' |
| <i>Mki67</i>       | 5' CCTTGTGTCCCCGAAGA 3'        | 5' GGCTTCTCATCTGTTGCTTCCT 3'   |
| <i>Nfkb1</i>       | 5' GCTGCCAAAGAAGGACACGACA 3'   | 5' GGCAGGCTATTGCTCATCACAG 3'   |
| <i>Pdgfra</i>      | 5' GCAGTTGCCTTACGACTCCAGA 3'   | 5' GGTTTGAGCATCTTCACAGCCAC 3'  |
| <i>Tgfb1</i>       | 5' GCCTGAGTGGCTGTCTTTTGA 3'    | 5' CACAAGAGCAGTGAGCGCTGAA 3'   |
| <i>Tnf</i>         | 5' GGTGCCTATGTCTCAGCCTCTT 3'   | 5' GCCATAGAAGTATGAGAGGGAG 3'   |
| <i>Vim</i>         | 5' CGGAAAGTGAATCCTTGCAGG 3'    | 5' AGCAGTGAGGTCAGGCTTGGAA 3'   |
| <i>Actb</i>        | 5' CATTGCTGACAGGATGCAGAAGG 3'  | 5' GCCATAGAAGTATGAGAGGGAG 3'   |
| <i>Gapdh</i>       | 5' AGGTCGGTGTGAACGGATTTG 3'    | 5' AGCAGTGAGGTCAGGCTTGGAA 3'   |

**Rat specific primer sequence used for real-time PCR**

| <i>Gene</i>   | <i>Forward</i>             | <i>Reverse</i>             |
|---------------|----------------------------|----------------------------|
| <i>Cdkn2b</i> | 5' ATGTGAGGCACTGAAGTGGG 3' | 5' CCTCAAGGGAAGTGGGTCAC 3' |
| <i>Gapdh</i>  | 5' CTCTCTGCTCCTCCCTGTTT 3' | 5' TACGGCCAAATCCGTTTACA 3' |
| <i>Actb</i>   | 5' GTCCACCCGCGAGTACAAC 3'  | 5' GGATGCCTCTCTTGCTCTGG 3' |
| <i>Hprt1</i>  | 5' GTCATGTCGACCCTCAGTCC 3' | 5' TTGGGGCTGTAAGTCTTGG 3'  |
| <i>Gusb</i>   | 5' GGGTGTGGTATGAACGGGAA 3' | 5' CTCTGGACCAGCTTGGTGT 3'  |
